# Supplementary material
Source: publisher site journal article supplement (https://www.dovepress.com/article/463601)
Supplement: Supplementary file 1 [file get_supplementary_file.php]

**Supplementary Figures**

**Supplementary Figure 1:** Tet-on Jurkat T cells with inducible expression of PPARγ. Tet-on Jurkat T cells stably transduced with the pLVX-TRE3G-mCherry-IRES-hPPARγ1 vector (Tet-on Jurkat T cells PPARγ1 OE) were stimulated for 24 h with 0.001, 0.01, 0.1, 0.5 or 1 µg/ml doxycycline. Where indicated the proteasome inhibitor MG132 [10 µM] is added for the last 4 h. HEK293T cells with a similar Tet-on system (HEK293T PPARg1 OE) were included as a positive control.

**Abbreviations**: 3G, third generation of the promoter; HEK293T, human embryonal kidney cell line expressing the large T-antigen of the simian virus 40; IRES, internal ribosomal entry site; MG132, carbobenzoxyl-L-leucyl-L-leucyl-L-leucine; OE, overexpressing; p, plasmid; LV, lentiviral vector; hPPARγ, human peroxisome proliferator-activated receptor γ; Tet, tetracycline; TRE, tetracycline responsive element.

**
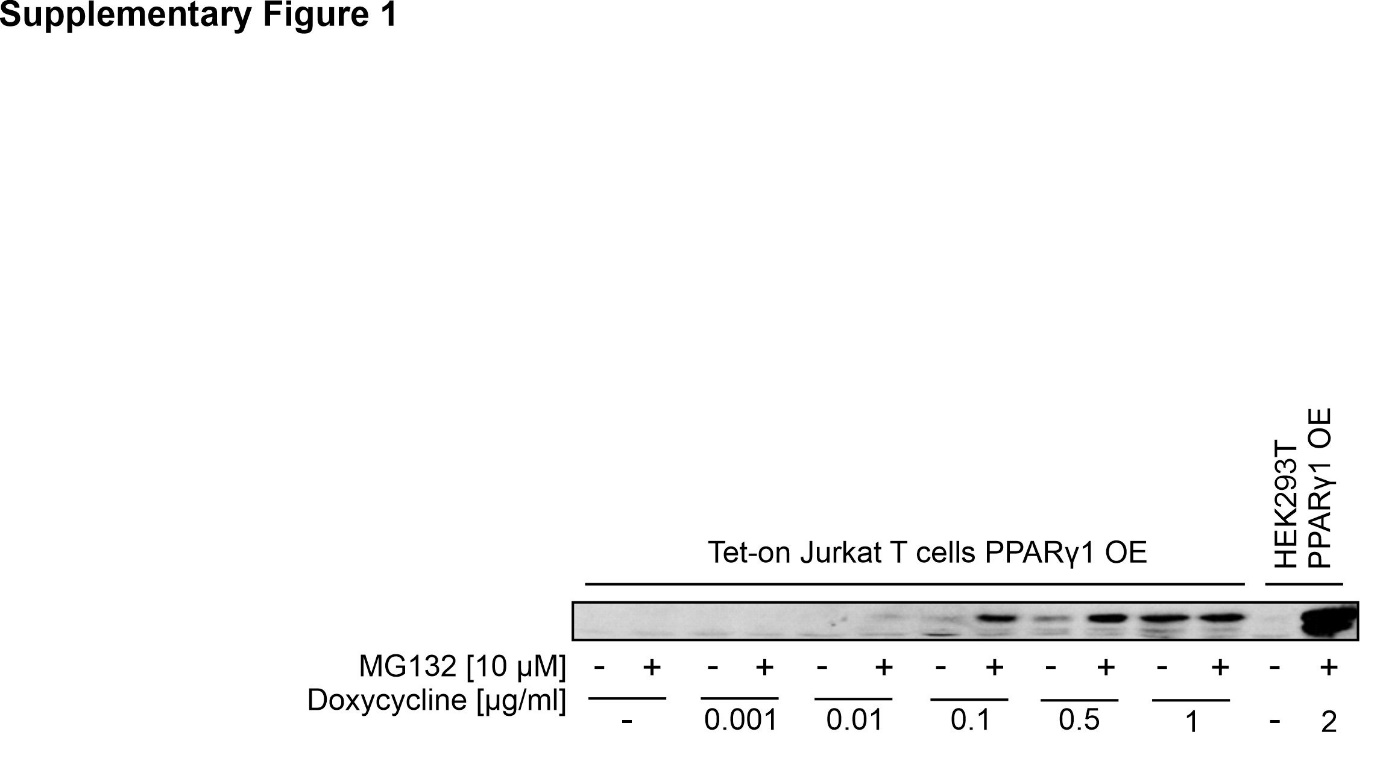
**

**Supplementary Figure 2:** Treatment of Jurkat T cells stably transduced with a Tet-on vector to express PPARγ following doxycycline stimulation. Jurkat PPARγ Tet-on T cells were seeded into a petridish and stimulate for 24 h with doxycycline to induce PPARγ expression. Afterwards cells were treated for 24 h either with 1 µM of the PPARγ agonist rosiglitazone or with a combination of rosiglitazone [1 µM] and GW9662 [10 µM], an irreversible PPARγ antagonist. Then, cells were harvested and mRNA was isolated. Following a library preparation, a next generation sequencing (NGS) approach was performed to identify PPARγ target genes. Genes regulated in response to PPARg activation are shown in **Table 1**, genes regulated following PPARγ inhibition are presented in **Table 2**.

**Abbreviations**: GW9662, 2-chloro-5-nitro-N-phenylbenzamide; NGS, next generation sequencing; PPARγ, peroxisome proliferator-activated receptor γ; Tet, tetracycline.

**
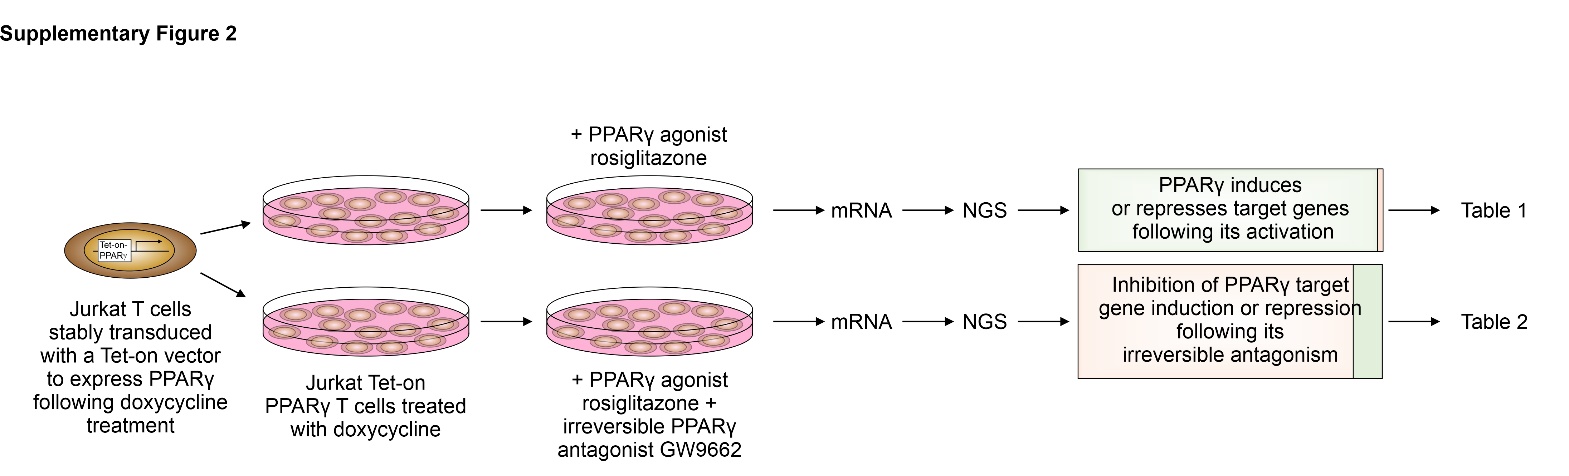
**

**Supplementary Figure 3:** Gating strategy used to determine the number of CD3+, CD4+, and CD8+ T cells. 100 µl of freshly drawn blood of COVID-19 patients or healthy donors were stained as described in Materials and Methods. Following erythrolysis, 50 µl of counting beads **(A)** were added to the sample. CD4+ T cells were further analysed for CRTH2, and FoxP3 expression **(B)**. Counting beads and relevant immune cell sub-populations are shown in red and marked with a red gate.

**Abbreviations**: A, area; APC, allophycocyanin; APC-Cy7, allophycocyanine-cyanine 7; CD, cluster of differentiation; COVID-19, corona disease 2019; CRTH2, chemokine receptor homologue expressed on Th2 cells; FITC, fluorescein-isothiocyanate; FoxP3, forkhead box protein 3; FSC, forward scatter; PE, phycoerythrin; PerCP-Cy5.5, peridinin-chlorophyll-protein-cyanine 5.5; SSC, side scatter.

**
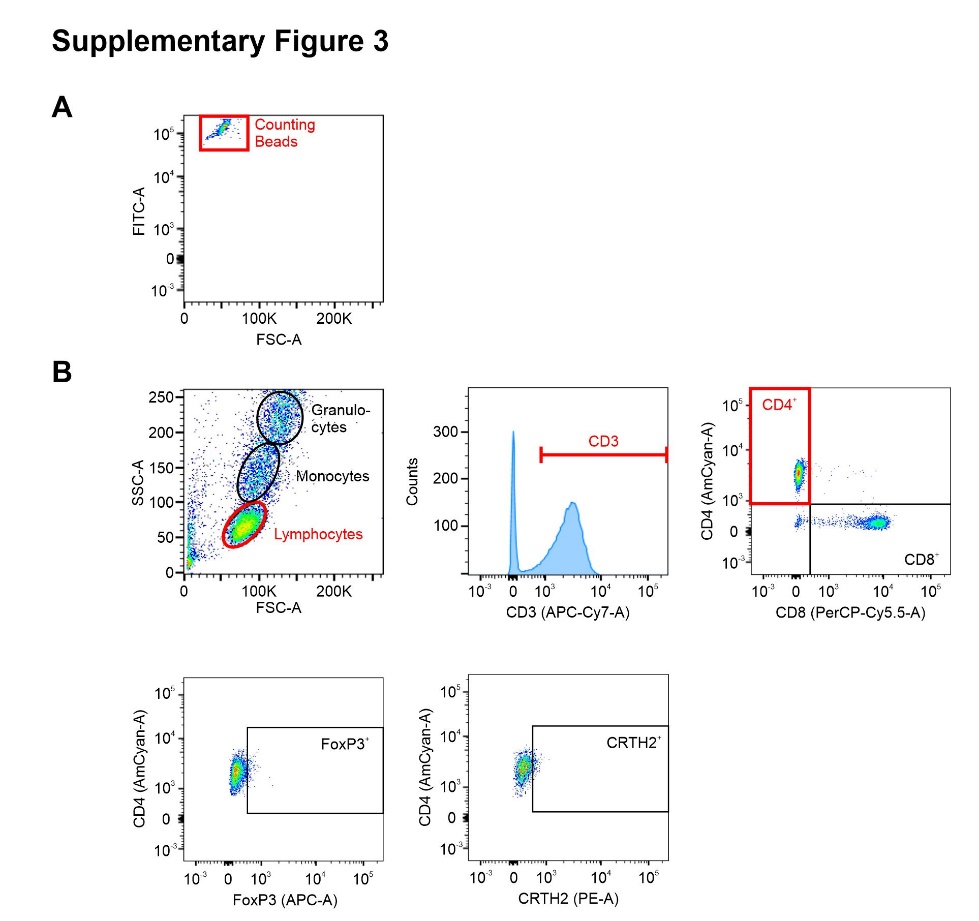
**

**Supplementary Figure 4:** Schematic diagram presenting intracellular PPARγ staining in peripheral blood cells of COVID-19 patients. Following lysis of erythrocytes, leukocytes derived from peripheral blood of COVID-19 patients were stained intracellularly with a PPARγ-specific antibody conjugated to AlexaFluor 750 (AF750) as described in Materials and Methods **(A)**. To show specific binding of the AF750-tagged antibody, an unconjugated antibody of the identical clone was added to the staining in 10-fold excess **(B)**. Instead, the untagged anti-PPARγ antibody, an unspecific antibody (anti-FoxP3-APC) was used in a third staining reaction in 10-fold excess **(C)**.

**Abbreviations**: α, anti; ab, antibody; AF, AlexaFluor; APC, allophycocyanin; COVID-19, coronavirus disease 2019; CP, competition; FoxP3, forkhead box protein 3; PPARγ, peroxisome proliferator-activated receptor γ; s, specific; us, unspecific.


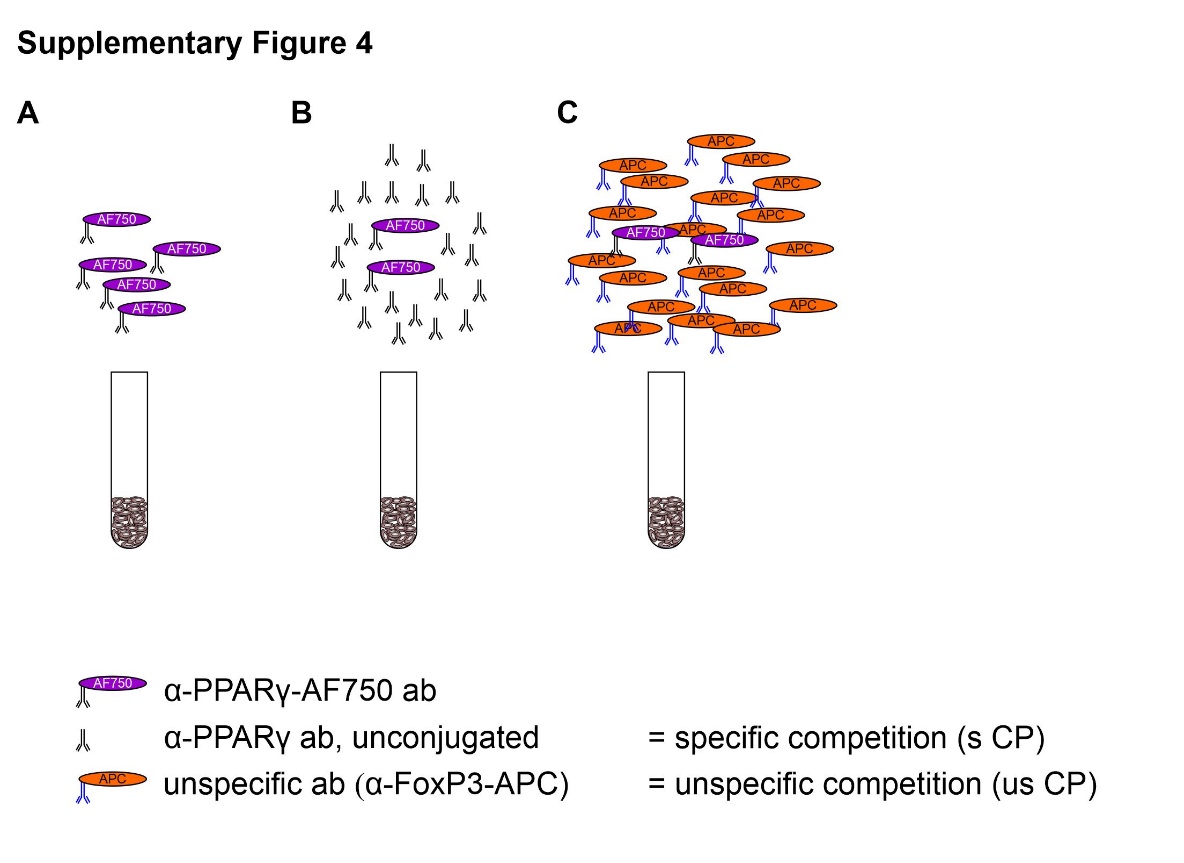


**Supplementary Figure 5:** Evaluation of MACS-dependent enrichment of human CD4+ T cells derived from peripheral blood of healthy donors before (left) and following enrichment (right). Enrichment was determined by FACS analysis. A representative result is shown.

**Abbreviations**: A, area; CD, cluster of differentiation; FACS, fluorescence-activated cell sorting; MACS, magnetic cell sorting; PerCP-Cy5.5, peridinin-chlorophyll-protein-cyanine 5.5.

**
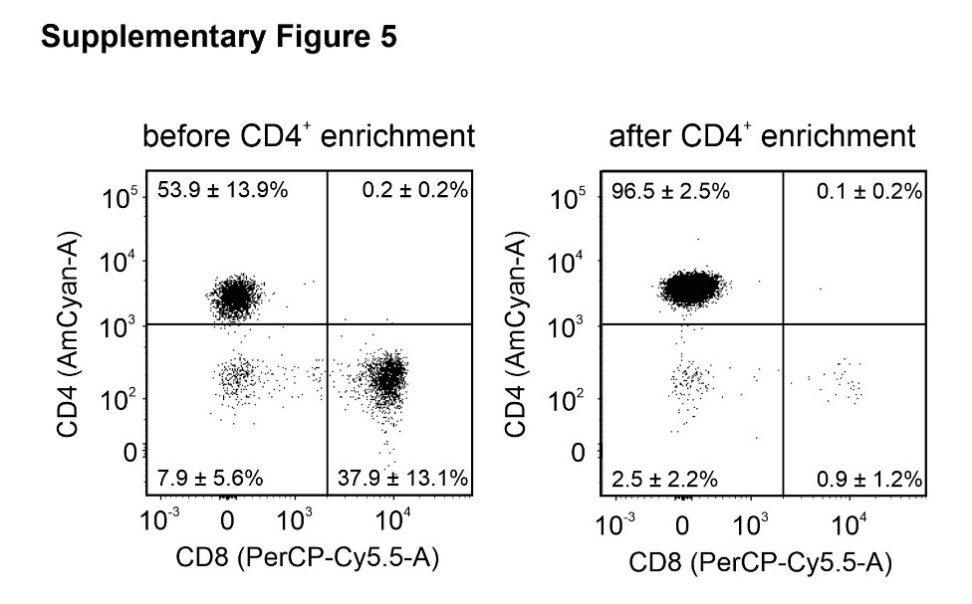
**

**Supplementary Figure 6:** Human CD4+ T cells were enriched by MACS separation (see Supplementary Figure 5). Afterwards, CD4+ T cells were differentiated for 13 days to Th2 cells as described in Materials and Methods. **(A)** To identify the efficiency of Th2 differentiation, cells were stained intracellularly for IL-4 as an Th2 and for IFNg as an Th1 marker cytokine before (left panel) or after Th2 differentiation (right panel). **(B)** To test whether Th2 cells can be shifted to a Th1 phenotype by mitogenic activation, we treated enriched CD4+ T cells before (left panel) and after Th2 differentiation (right panel) with an activation cocktail, containing PMA and ionomycin as stimuli and monensin to prevent cytokine release from the cells. Concerning different requirements to prevent cytokine release, we also added BD Golgi-PlugTM, containing brefeldin A as described in Materials and Methods.

**Abbreviations**: A, area; BD, Becton Dickinson; CD, cluster of differentiation; IL-4, interleukin-4; IFN-g, interferon-g; MACS, magnetic cell sorting; PerCP-Cy5.5, peridinin-chlorophyll-protein-cyanine 5.5; PMA, phorbol myristate acetate; Th1, T helper cells type 1; Th2, T helper cells type 2.

**
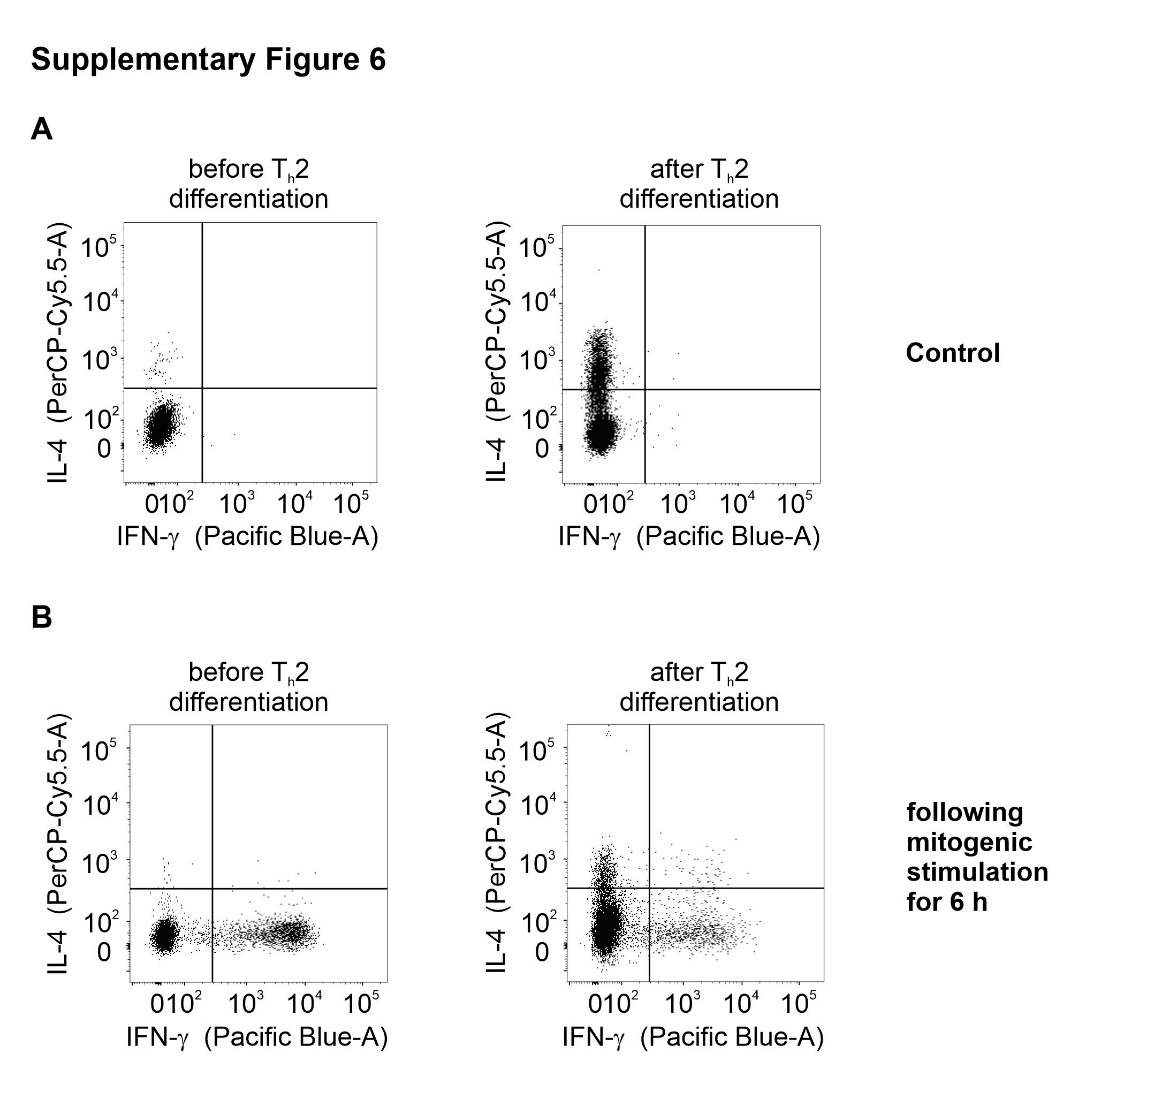
**

**Supplementary Figure 7:** Release of **(A)** procalcitonin (PCT), **(B)** IL-6, **(C)** C-reactive protein (CRP), and **(D)** lactate-dehydrogenase (LDH). Amounts were determined for 30 days intensive care unit stay (d ICU) (n = 24). Hospital’s central laboratory’s threshold levels (C) are PCT: 0,5 ng/ml, IL-6: 7 pg/ml, CRP: 0,5 mg/dl, LDH: 248 U/l and are shown as a green dashed line. To show the impact of the necessary treatment, we compared the amounts of non-ventilated (white columns, NV, n = 5 patients), ventilated (light grey columns, V, n = 12 patients) and extracorporeal membrane oxygenation (dark grey columns, E, n = 7 patients) requiring patients of **(E)** PCT, **(F)** IL-6, **(G)** CRP, and **(H)** LDH. Finally, we determined the amount of **(I)** PCT, **(J)** IL-6, **(K)** CRP and **(L)** LDH in surviving (S, n = 5 patients) vs. deceased (D, n = 19 patients) patients. In **(E)** to **(L)** means were calculated from all samples of the particular patient. These were used to determine the corresponding means, which are shown. * p < 0.05, **p < 0.01, ***p < 0.001.

**Abbreviations**: C, hospital’s central laboratory’s threshold levels; CRP, C-reactive protein; d, days; D, deceased; E, extracorporeal membrane oxygenation; ICU, intensive care unit; IL-6, interleukin-6; LDH, lactate-dehydrogenase; NV, non-ventilated; PCT, procalcitonin; S, surviving; U, units; V, ventilated.

**
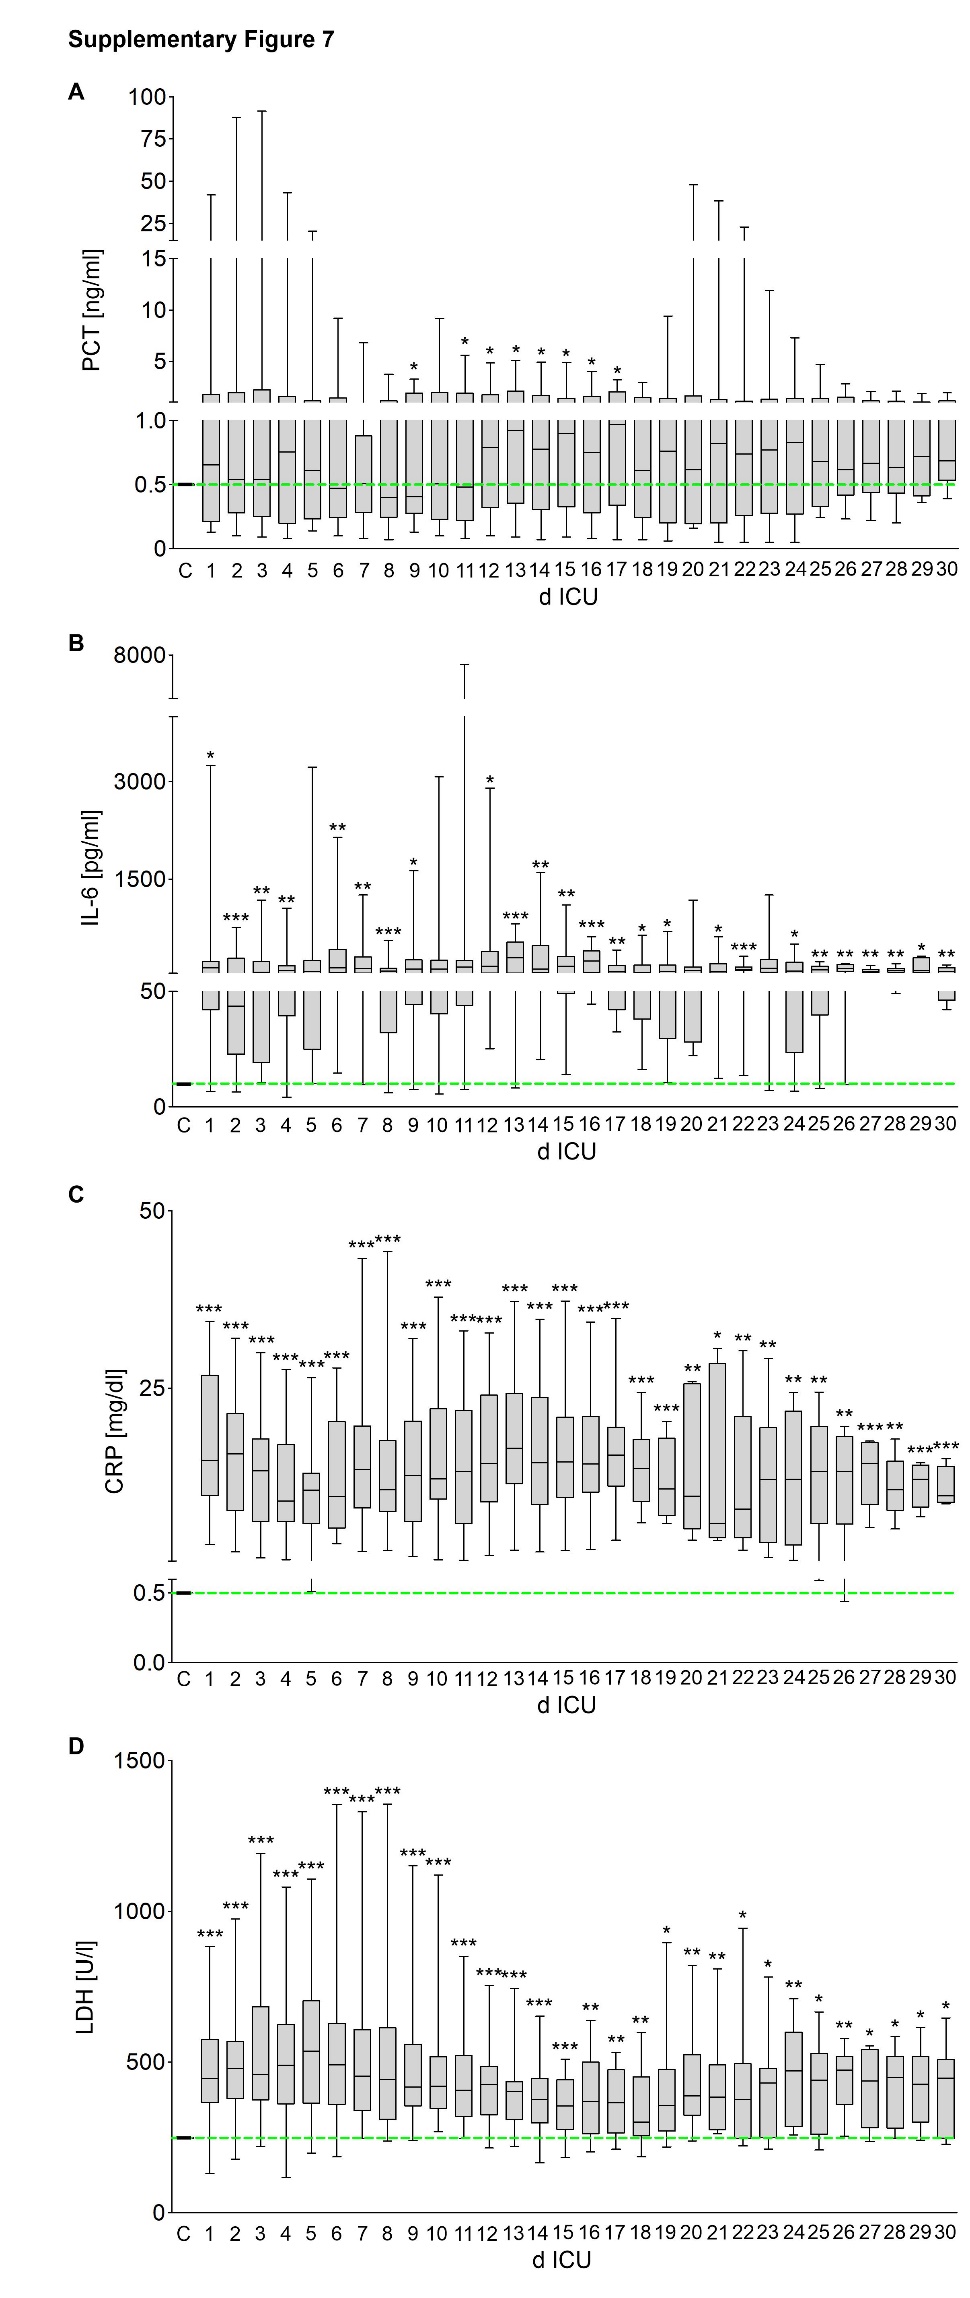
**

**
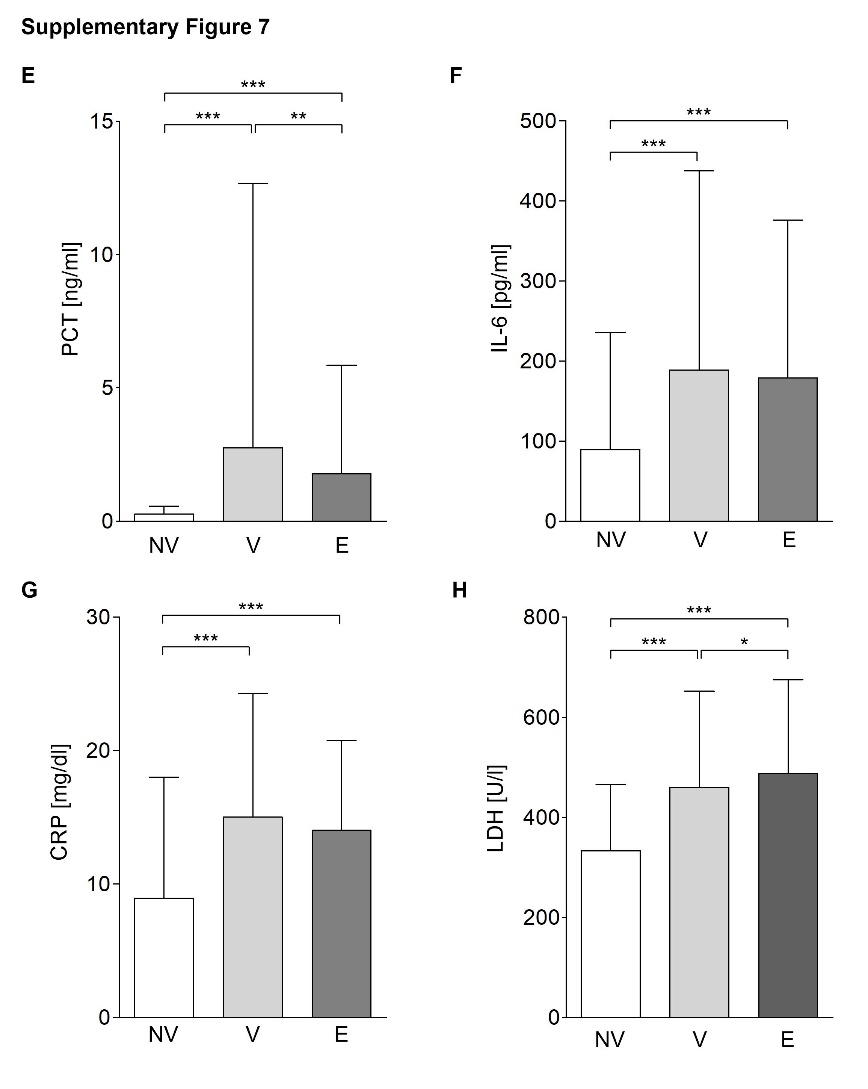
**

**
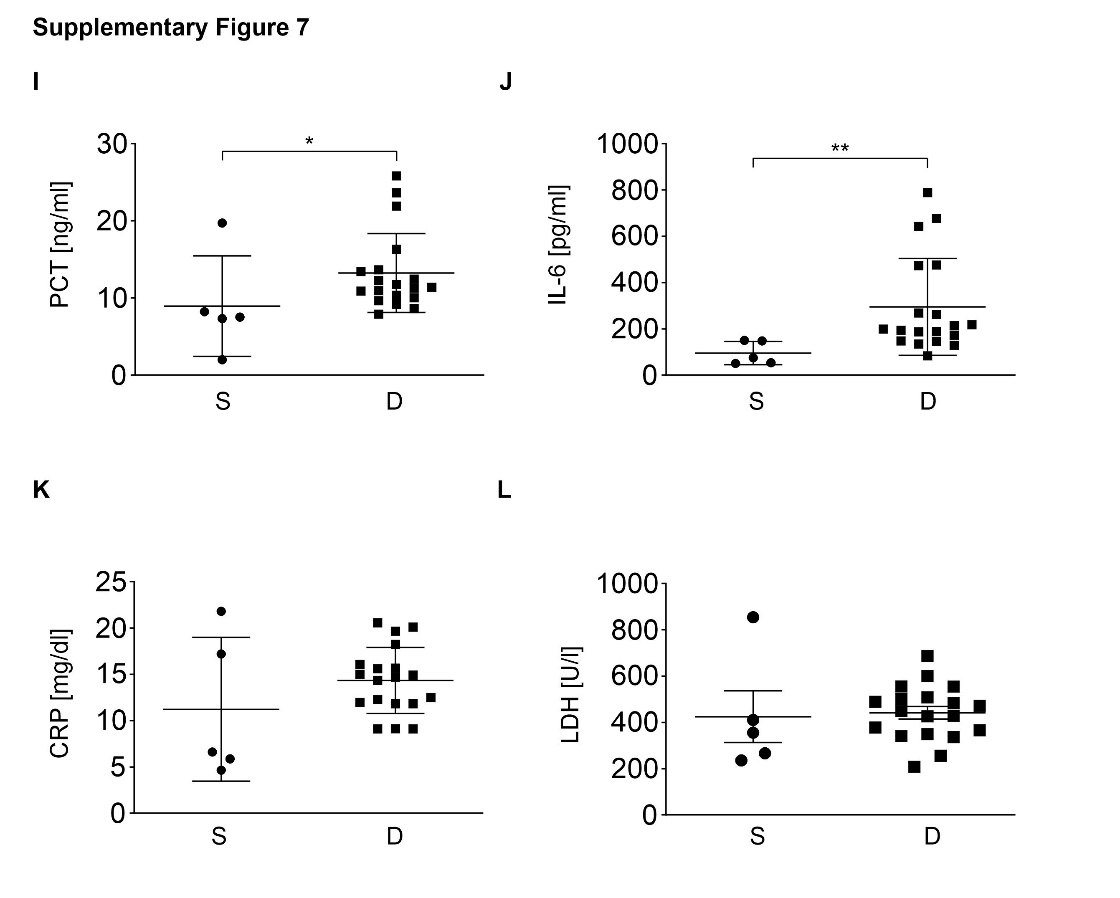
**

**Supplementary Figure 8:** Percentage ofTh2 cells and regulatory T cells (Treg) of CD4+ T cells in the blood of intensive care COVID-19 patients. The chemoattractant receptor-homologous molecule expressed on Th2 cells (CRTH2) surface marker was stained **(A)** to determine the percentage of Th2 cells of CD4+ T cells in COVID-19 patients, who survived (S) or died (D), compared to healthy donors (HD). In a second step, the percentage of CRTH2 expressing CD4+ T cells of female and male patients, who survived (S) or died (D), was analysed in comparison to healthy donors (HD) **(B)**. The percentage of FoxP3+ cells of CD4+ T cells was intracellularly detected **(C)** as a Treg marker comparing surviving (S) or deceased (D) COVID-19 patients with healthy donors (HD). To find out whether there is a difference in the percentage of FoxP3+ cells of CD4+ T cells in male vs. female COVID-19 patients, who survived (S) or deceased (D) compared to healthy controls (HD), we determined its expression in **(D).**  Means calculated from all samples of the particular patients were used to determine the corresponding means, which are shown. All values are presented as percentage of CD4+ cells in peripheral blood. * p < 0.05, **p < 0.01.

**Abbreviations:** CD, cluster of differentiation; COVID-19, coronavirus disease 2019; CRTH2, chemokine receptor homologue expressed on Th2 cells; D, deceased; f, female; FoxP3, forkhead box protein 3; HD, healthy donors; m, male; S, survived; Th2, T helper cells type 2; Treg, regulatory T cells.

**
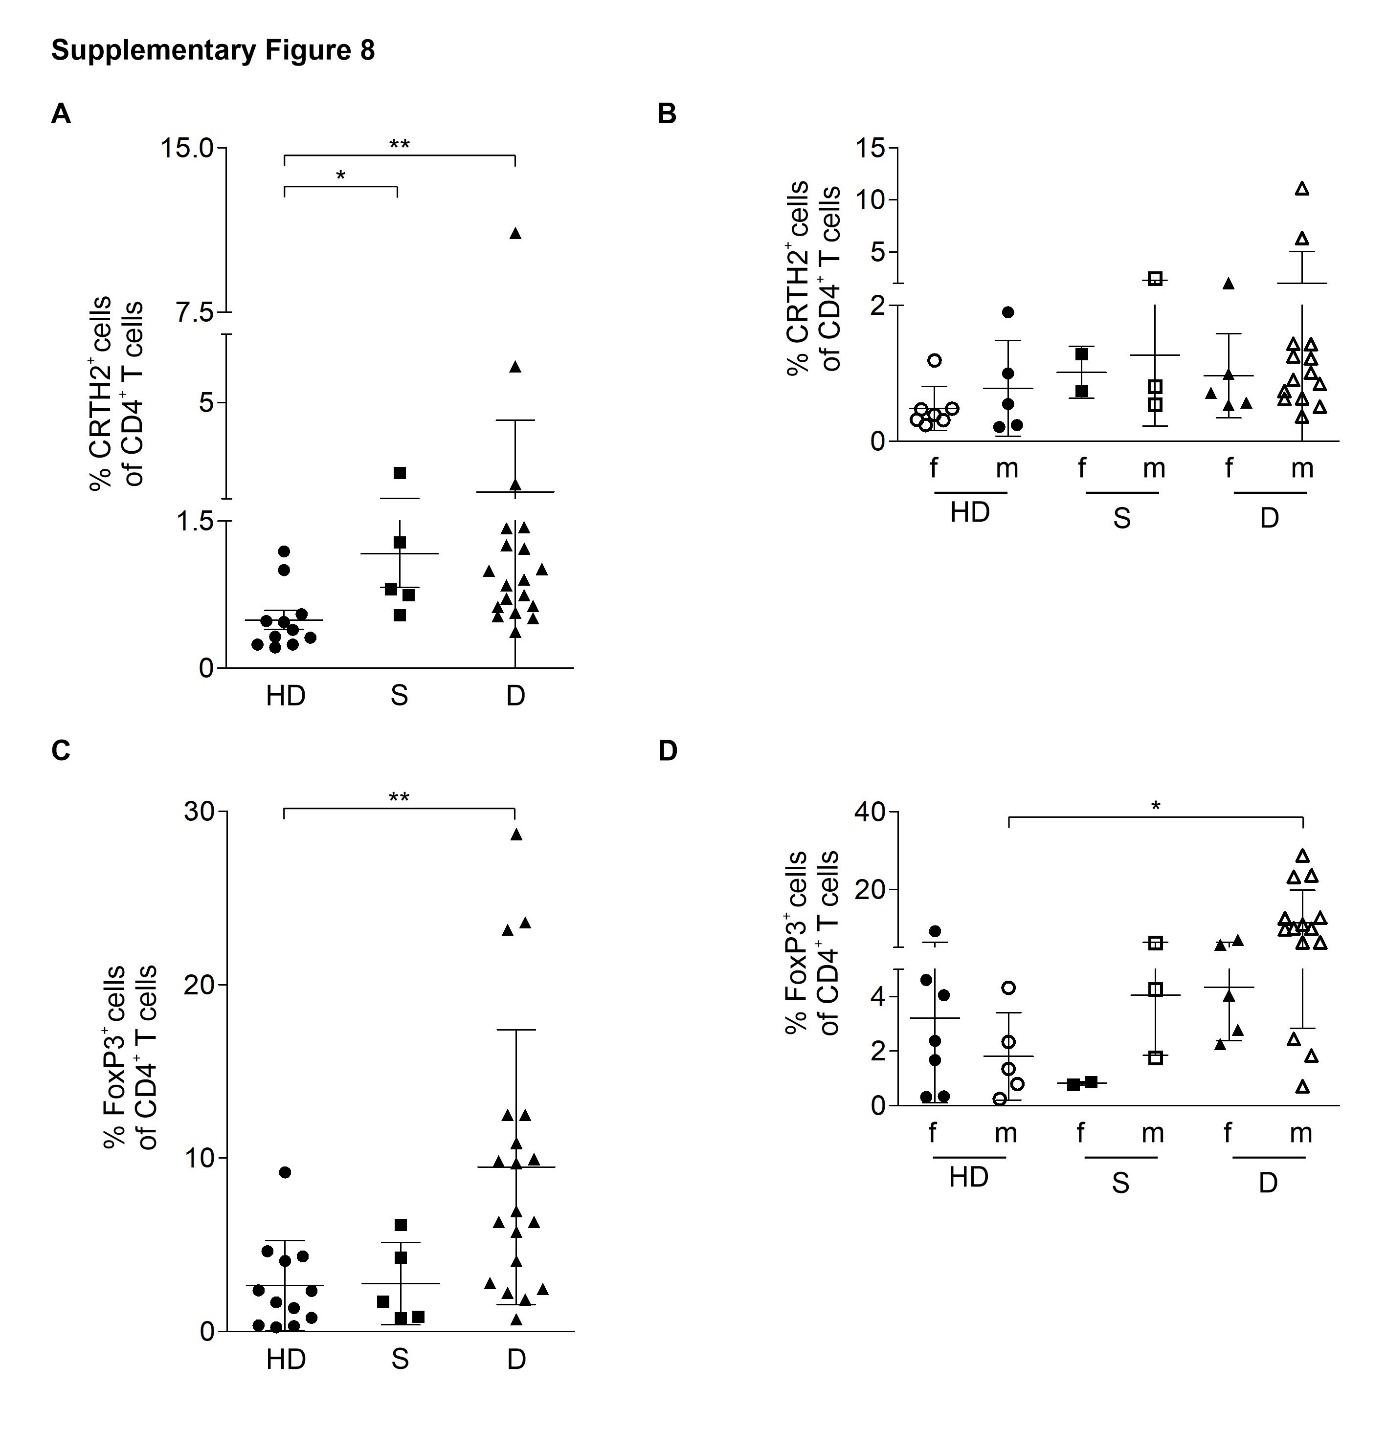
**

**Supplementary Figure 9:** Cell death of CD3+ T cells derived from the blood of intensive care COVID-19 patients. Patients were divided, according to their treatment regimens, into non-ventilated (NV, n = 5 patients), ventilated (V, n = 12 patients) and extracorporeal membrane oxygenation (ECMO, n = 7 patients). CD3+ T cells of healthy donors (n = 12 donors) was used as a control. Cell death was determined by Annexin V-staining to show apoptotic cells and 7-aminoactinomycin D (7-AAD) was used to stain necrotic cells.

Abbreviations: 7-AAD, 7-aminoactinomycin D; CD, cluster of differentiation; COVID-19, coronavirus disease 2019; ECMO, extracorporeal membrane oxygenation; NV, non-ventilated; V, ventilated.

**
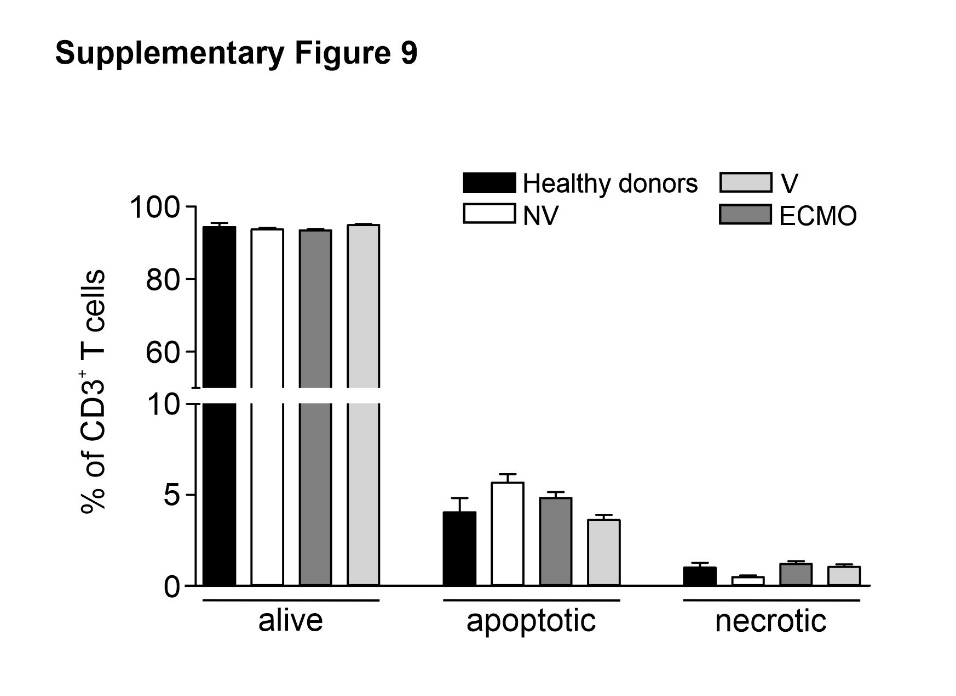
**

**Supplementary Figure 10:** To validate PPARγ transactivation, HEK293T cells were additionally transfected with a PPARγ encoding construct with a mutated first zinc-finger domain, not allowing DNA-binding (M1, C→A) and a second mutated construct not allowing ligand-binding (M2, L284A). PPARγ transactivation is determined as RLU as described in Materials and Methods. The required PPARγ-dependent reporter system is transiently transfected in parallel. ***p < 0.001.

**Abbreviations**: HEK293T, human embryonic kidney cells expressing the large T cell antigen of simian virus 40; M, mutated; PPARγ, peroxisome proliferator-activated receptor γ; RLU, relative luciferase units; WT, wild type

**
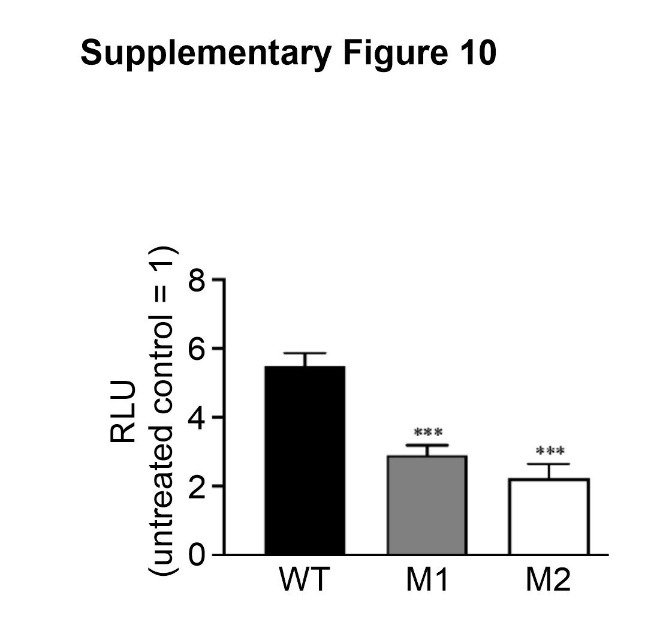
**

**Supplementary Figure 11:** Jurkat T cells have been stably transduced with a CRTH2 encoding construct (middle panel) or and CRTH2-EGFP encoding vector (right panel).Positive clones were identified by staining for CRTH2 expression as described in Materials and Methods. Positive cells have been enriched by cell sorting using a BD FACSAriaTM III cell sorter.

**Abbreviations**: A, area; BD, Becton Dickinson; CRTH2, chemokine receptor homologue expressed on Th2 cells; EGFP, enhanced green fluorescent protein; FACS, fluorescence-activated cell sorting; FITC, fluorescein-isothiocyanate; PE, phycoerythrin; WT, wild type.

**
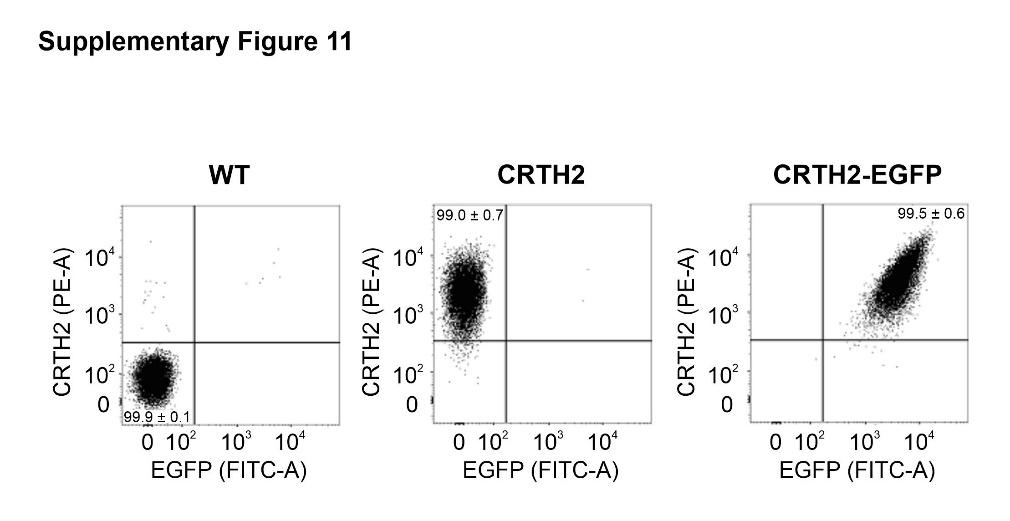
**

**Supplementary Figure 12:** Jurkat T cells have been treated with 0.1, 1, and 10 µM of 15d-PGJ2 for 24 h. To follow cell death, cells were stained with annexin V-PE and 7-aminoactinomycin D (7-AAD) as described in Materials and Methods. In **(A)** the staining of wild type Jurkat T cells is depicted. The quantification of experiments using wild type, CRTH2 and CRTH2-EGFP expressing Jurkat T cells is provided in **(B)**. ** p < 0.05.

**Abbreviations**: 7-AAD, 7-aminoactinomycin D; 15-dPGJ2, 15-deoxy-∆12,14-prostaglandin J2; A, area; CRTH2, chemokine receptor homologue expressed on Th2 cells; EGFP, enhanced green fluorescent protein; PE, phycoerythrin; PerCP-Cy5.5, peridinin-chlorophyll-protein-cyanine 5.5; WT, wild type.


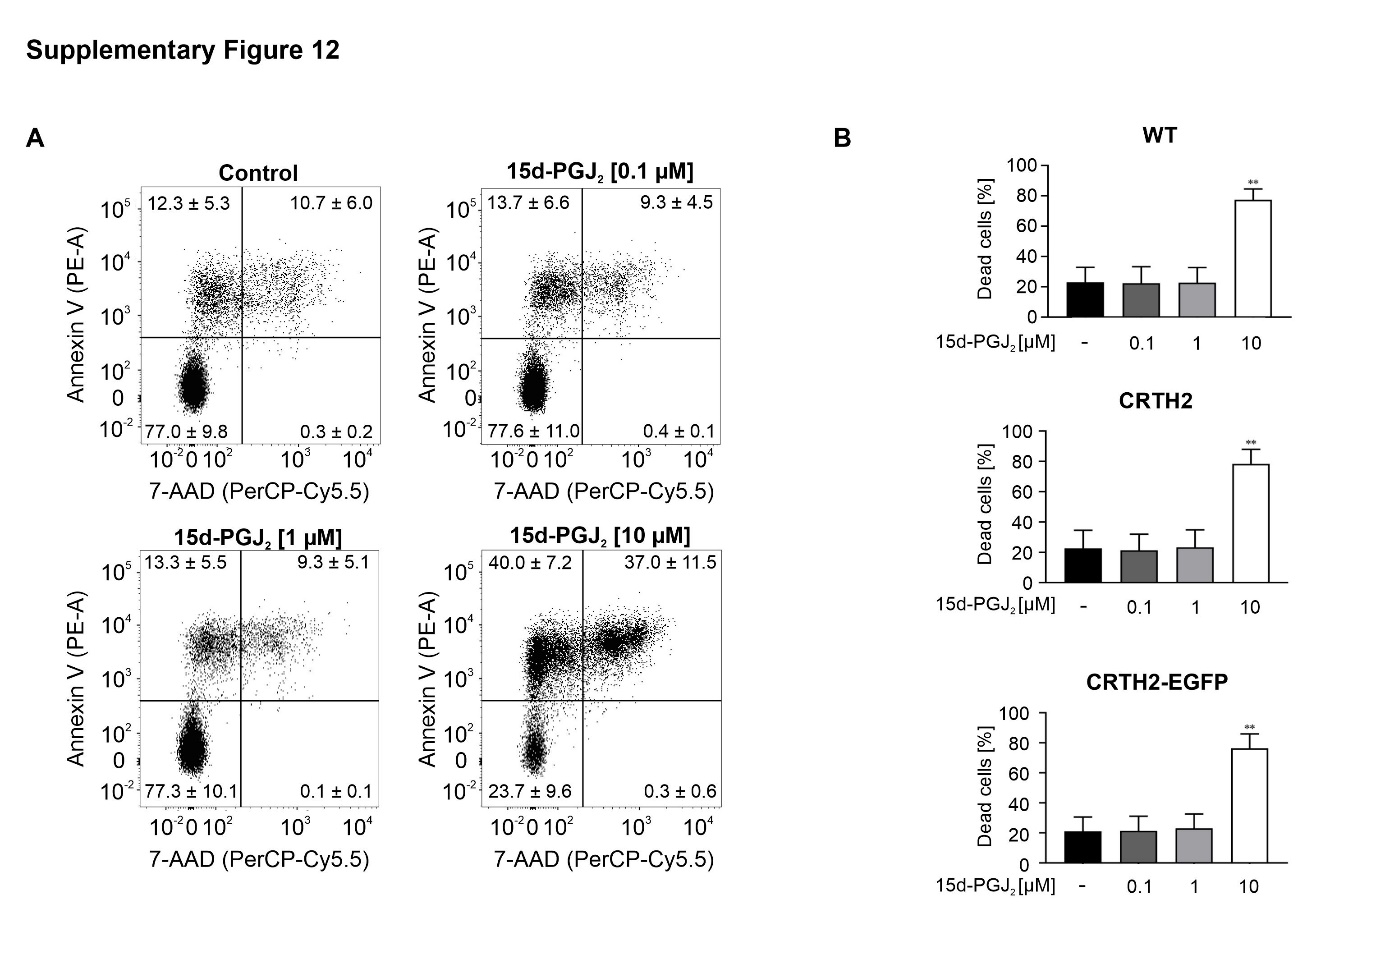


**Supplementary Figure 13:** CD4+ T cells were enriched from blood of healthy donors by positive isolation using the MACS based technology. CD4+ T cells were differentiated for 13 days as described in Materials and Methods. In parallel, the PPARγ antagonist GW9662 [10 µM] was added to determine the effect of PPARγ antagonization on Th2 differentiation. After 13 days, CD4+ cells were analysed for expression of the intracellular Th2 marker IL-4 **(A)** (n = 6) and the cell surface marker CRTH2 **(B)** (n = 6). * p < 0.05.

**Abbreviations:** CD, cluster of differentiation; CRTH2, chemokine receptor homologue expressed on Th2 cells; GW9662, 2-chloro-5-nitro-N-phenylbenzamide; IL-4, interleukin-4; MACS, magnetic cell separation; PPARγ, peroxisome proliferator activated receptor γ; Th2, T helper cells type 2.


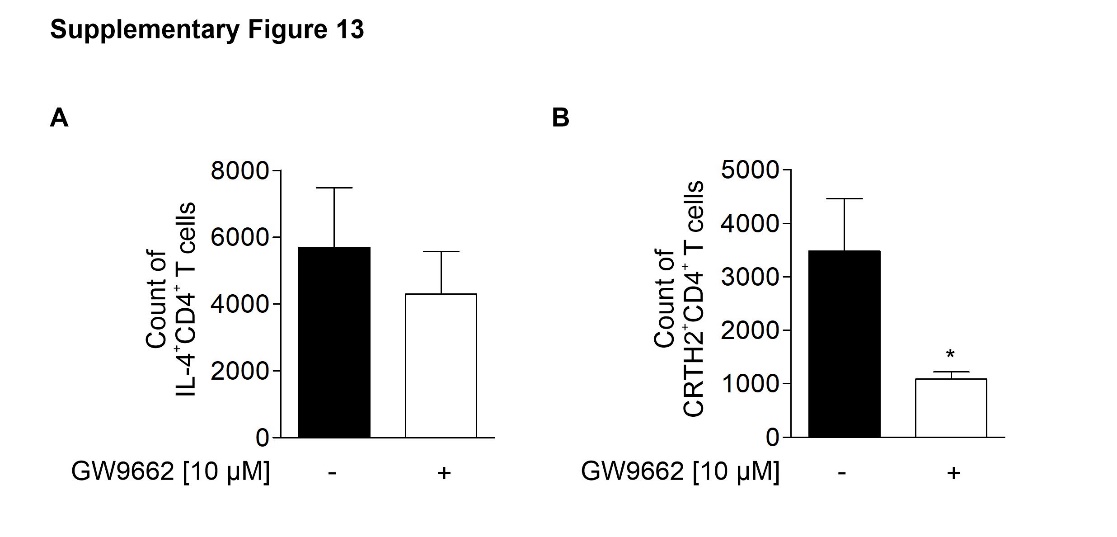


**Supplementary Table**

**Supplementary Table 1** Abbreviations used in the manuscript

| 15d-PGJ2 | 15-deoxy-∆12,14-prostaglandin J2 |
| --- | --- |
| 3G | 3rd generation of the promoter |
| 7-AAD | 7-aminoactinomycin D |
| A | Area |
| α | Anti |
| ab | Antibody |
| AF | activation function |
| AF750 | AlexaFluor750 |
| ALI | acute lung injury |
| A-Ox | acyl coenzym A oxidase |
| APC | Allophycocyanin |
| ATCC | American Type Culture Collection |
| BD | Becton Dickinson |
| bp | base pair(s) |
| CD | cluster of differentiation |
| CLP | cecal ligation and puncture |
| CMV | Cytomegalovirus |
| COVID | coronavirus disease |
| COPD | chronic obstructive pulmonary disease |
| CP | Competition |
| CPM | counts per million |
| CRP | c-reactive protein |
| CRTH2 | chemoattractant receptor-homologous molecule expressed on T helper type 2 cells |
| CTL | cytotoxic T cells |
| D | Deceased |
| d | Days |
| d/n | dominant negative |
| DAMP | damage-assocoated molecular pattern |
| DK-PGD2 | 13,14-dihydro-15-keto-PGD2 |
| DMEM | Dulbecco´s modified eagle medium |
| DPBS | Dulbecco´s phosphate-buffered saline without Ca2+/Mg2+ |
| DSMZ | German Collection of Microorganisms and Cell Cultures GmbH |
| E | extracorporeal membrane oxygenation |
| ECMO | extracorporeal membrane oxygenation |
| EGFP | enhanced green fluorescent protein |
| ENSG…ID | gene anotation in Ensembl |
| f | Female |
| FACS | fluorescent cell sorting |
| FastQC | fast quality control (software) |
| FCS | fetal calf serum |
| FDR | false discovery rate |
| FITC | fluorescein-isothiocyanate |
| FL | firefly luciferase |
| FoxP3 | forkhead box protein P3 |
| FSC | forward scatter |
| GW9662 | 2-chloro-5-nitro-N-phenylbenzamide |
| HD | healthy donors |
| HEK | human epithelial kidney |
| HGNC | HUGO Gene Nomenclature Committee |
| Hifi | Hifidelity |
| HMGB1 | high mobility group protein B1 |
| ICU | intensive care unit |
| ID | Identifier |
| IFN-g | interferon-gamma |
| IL | Interleukin |
| IHRES | internal ribosomal entry site |
| LDH | lactate dehydrogenase |
| logFC | false discovery change |
| LVX | Lentiviral |
| m | Male |
| MACS | magnetic cell sorting |
| MG132 | carbobenzoxyl-L-leucyl-L-leucyl-L-leucine |
| MOF | multi organ failure |
| NF-AT | nuclear factor of activated T cells |
| NF-κB | nuclear factor κ-light-chain-enhancer of activated B-cells |
| NGS | next generation sequencing |
| NV | non-ventilated |
| OE | Overexpression |
| p | Plasmid |
| PCR | polymerase chain reaction |
| PCT | Procalcitonin |
| PE | Phycoerythrin |
| PerCP | peridinin-chlorophyll-protein |
| PGD2 | prostaglandin D2 |
| PMA | phorbol-myristate 13-acetate |
| PPARγ | peroxisome proliferator receptor γ |
| PPRE | peroxisome proliferator receptor responsive element |
| PTEN | phosphatase and tensin homolog |
| RLU | Renilla luciferase |
| RLU | relative luciferase units |
| RNA | ribonulceotide acid |
| RPKM | reads per kilobase of exon model per million |
| RT | room temperature |
| s | Specific |
| S | Surviving |
| SARS-CoV2 | severe acute respiratory syndrome coronavirus 2 |
| SD | standard deviation |
| SE | standard error |
| SSC | side scatter |
| Th1 | T helper cells type 1 |
| Th2 | T helper cells type 2 |
| TK | thymidin kinase |
| TRE | tetracycline responsive element |
| Treg | regulatory T cells |
| TXA2 | thromboxan A2 |
| U | Units |
| us | Unspecific |
| V | Ventilated |
| wt | wild type |
| yr | Year |
